# Supplementary material
Source: publisher figshare collection journal article supplement (https://acs.figshare.com/ndownloader/files/4721917)
Supplement: Supplementary file 1 [file 4721917]

 
data_p-1
 
_audit_creation_method            SHELXL-97
_chemical_name_systematic
;
 ?
;
_chemical_name_common             ?
_chemical_melting_point           ?
_chemical_formula_moiety          ?
_chemical_formula_sum
 'C16 H14 Co0.50 N8 O3 W'
_chemical_formula_weight          579.67
 
loop_
 _atom_type_symbol
 _atom_type_description
 _atom_type_scat_dispersion_real
 _atom_type_scat_dispersion_imag
 _atom_type_scat_source
 'C'  'C'   0.0033   0.0016
 'International Tables Vol C Tables 4.2.6.8 and 6.1.1.4'
 'H'  'H'   0.0000   0.0000
 'International Tables Vol C Tables 4.2.6.8 and 6.1.1.4'
 'N'  'N'   0.0061   0.0033
 'International Tables Vol C Tables 4.2.6.8 and 6.1.1.4'
 'O'  'O'   0.0106   0.0060
 'International Tables Vol C Tables 4.2.6.8 and 6.1.1.4'
 'Co'  'Co'   0.3494   0.9721
 'International Tables Vol C Tables 4.2.6.8 and 6.1.1.4'
 'W'  'W'  -0.8490   6.8722
 'International Tables Vol C Tables 4.2.6.8 and 6.1.1.4'
 
_symmetry_cell_setting            triclinic
_symmetry_space_group_name_H-M    P-1
 
loop_
 _symmetry_equiv_pos_as_xyz
 'x, y, z'
 '-x, -y, -z'
 
_cell_length_a                    8.3504(6)
_cell_length_b                    10.5157(8)
_cell_length_c                    11.8710(9)
_cell_angle_alpha                 99.5090(10)
_cell_angle_beta                  100.8330(10)
_cell_angle_gamma                 107.0080(10)
_cell_volume                      951.76(12)
_cell_formula_units_Z             2
_cell_measurement_temperature     130
_cell_measurement_reflns_used     ?
_cell_measurement_theta_min       ?
_cell_measurement_theta_max       ?
 
_exptl_crystal_description        block
_exptl_crystal_colour             red
_exptl_crystal_size_max           0.3
_exptl_crystal_size_mid           0.1
_exptl_crystal_size_min           0.08
_exptl_crystal_density_meas       ?
_exptl_crystal_density_diffrn     2.023
_exptl_crystal_density_method     'not measured'
_exptl_crystal_F_000              555
_exptl_absorpt_coefficient_mu     6.525
_exptl_absorpt_correction_type    multi-scan
_exptl_absorpt_correction_T_min   ?
_exptl_absorpt_correction_T_max   ?
_exptl_absorpt_process_details    sadabs
 
_exptl_special_details
;
  Ratio of minimum to maximum apparent transmission:  0.572827
;
 
_diffrn_ambient_temperature       130
_diffrn_radiation_wavelength      0.71073
_diffrn_radiation_type            MoK\a
_diffrn_radiation_source          'fine-focus sealed tube'
_diffrn_radiation_monochromator   graphite
_diffrn_measurement_device_type   ?
_diffrn_measurement_method        ?
_diffrn_detector_area_resol_mean  ?
_diffrn_standards_number          ?
_diffrn_standards_interval_count  ?
_diffrn_standards_interval_time   ?
_diffrn_standards_decay_%         ?
_diffrn_reflns_number             9999
_diffrn_reflns_av_R_equivalents   0.0141
_diffrn_reflns_av_sigmaI/netI     0.0164
_diffrn_reflns_limit_h_min        -10
_diffrn_reflns_limit_h_max        10
_diffrn_reflns_limit_k_min        -13
_diffrn_reflns_limit_k_max        13
_diffrn_reflns_limit_l_min        -15
_diffrn_reflns_limit_l_max        14
_diffrn_reflns_theta_min          1.80
_diffrn_reflns_theta_max          27.39
_reflns_number_total              3905
_reflns_number_gt                 3813
_reflns_threshold_expression      >2sigma(I)
 
_computing_data_collection        ?
_computing_cell_refinement        ?
_computing_data_reduction         ?
_computing_structure_solution     ?
_computing_structure_refinement   'SHELXL-97 (Sheldrick, 1997)'
_computing_molecular_graphics     ?
_computing_publication_material   ?
 
_refine_special_details
;
 Refinement of F^2^ against ALL reflections.  The weighted R-factor wR and
 goodness of fit S are based on F^2^, conventional R-factors R are based
 on F, with F set to zero for negative F^2^. The threshold expression of
 F^2^ > 2sigma(F^2^) is used only for calculating R-factors(gt) etc. and is
 not relevant to the choice of reflections for refinement.  R-factors based
 on F^2^ are statistically about twice as large as those based on F, and R-
 factors based on ALL data will be even larger.
;
 
_refine_ls_structure_factor_coef  Fsqd
_refine_ls_matrix_type            full
_refine_ls_weighting_scheme       calc
_refine_ls_weighting_details
 'calc w=1/[\s^2^(Fo^2^)+(0.0089P)^2^+1.2718P] where P=(Fo^2^+2Fc^2^)/3'
_atom_sites_solution_primary      direct
_atom_sites_solution_secondary    difmap
_atom_sites_solution_hydrogens    geom
_refine_ls_hydrogen_treatment     mixed
_refine_ls_extinction_method      none
_refine_ls_extinction_coef        ?
_refine_ls_number_reflns          3905
_refine_ls_number_parameters      283
_refine_ls_number_restraints      0
_refine_ls_R_factor_all           0.0146
_refine_ls_R_factor_gt            0.0140
_refine_ls_wR_factor_ref          0.0317
_refine_ls_wR_factor_gt           0.0315
_refine_ls_goodness_of_fit_ref    1.086
_refine_ls_restrained_S_all       1.086
_refine_ls_shift/su_max           0.057
_refine_ls_shift/su_mean          0.001
 
loop_
 _atom_site_label
 _atom_site_type_symbol
 _atom_site_fract_x
 _atom_site_fract_y
 _atom_site_fract_z
 _atom_site_U_iso_or_equiv
 _atom_site_adp_type
 _atom_site_occupancy
 _atom_site_symmetry_multiplicity
 _atom_site_calc_flag
 _atom_site_refinement_flags
 _atom_site_disorder_assembly
 _atom_site_disorder_group
W1 W 0.347045(11) 0.813677(9) 0.727214(8) 0.01297(3) Uani 1 1 d . . .
C1 C 0.6098(3) 0.8818(2) 0.8322(2) 0.0175(5) Uani 1 1 d . . .
N1 N 0.7484(3) 0.9165(2) 0.88965(18) 0.0198(4) Uani 1 1 d . . .
C2 C 0.4145(3) 0.6310(3) 0.7195(2) 0.0195(5) Uani 1 1 d . . .
N2 N 0.4460(3) 0.5318(2) 0.7106(2) 0.0272(5) Uani 1 1 d . . .
C3 C 0.3521(3) 0.7912(3) 0.9038(2) 0.0200(5) Uani 1 1 d . . .
N3 N 0.3401(3) 0.7793(3) 0.99667(19) 0.0284(5) Uani 1 1 d . . .
C4 C 0.4970(3) 0.7989(2) 0.6000(2) 0.0191(5) Uani 1 1 d . . .
N4 N 0.5765(3) 0.7882(2) 0.5321(2) 0.0267(5) Uani 1 1 d . . .
C5 C 0.4680(3) 1.0238(3) 0.7257(2) 0.0190(5) Uani 1 1 d . . .
N5 N 0.5353(3) 1.1347(2) 0.72281(19) 0.0278(5) Uani 1 1 d . . .
C6 C 0.1913(3) 0.9226(2) 0.8009(2) 0.0172(5) Uani 1 1 d . . .
N6 N 0.1129(3) 0.9727(2) 0.85157(18) 0.0192(4) Uani 1 1 d . . .
N7 N 0.1749(2) 0.8203(2) 0.56251(17) 0.0163(4) Uani 1 1 d . . .
N8 N 0.0970(2) 0.6458(2) 0.69654(17) 0.0169(4) Uani 1 1 d . . .
C7 C 0.2237(3) 0.9046(3) 0.4914(2) 0.0205(5) Uani 1 1 d . . .
H7 H 0.3386 0.9608 0.5096 0.025 Uiso 1 1 calc R . .
C8 C 0.1110(3) 0.9111(3) 0.3932(2) 0.0235(5) Uani 1 1 d . . .
H8 H 0.1497 0.9701 0.3462 0.028 Uiso 1 1 calc R . .
C9 C -0.0602(3) 0.8288(3) 0.3657(2) 0.0225(5) Uani 1 1 d . . .
H9 H -0.1389 0.8320 0.3004 0.027 Uiso 1 1 calc R . .
C10 C -0.1123(3) 0.7416(3) 0.4371(2) 0.0198(5) Uani 1 1 d . . .
H10 H -0.2271 0.6854 0.4201 0.024 Uiso 1 1 calc R . .
C11 C 0.0066(3) 0.7377(2) 0.5340(2) 0.0159(5) Uani 1 1 d . . .
C12 C -0.0367(3) 0.6410(2) 0.6084(2) 0.0169(5) Uani 1 1 d . . .
C13 C -0.2001(3) 0.5449(3) 0.5886(2) 0.0212(5) Uani 1 1 d . . .
H13 H -0.2907 0.5445 0.5293 0.025 Uiso 1 1 calc R . .
C14 C -0.2278(3) 0.4505(3) 0.6568(2) 0.0233(5) Uani 1 1 d . . .
H14 H -0.3367 0.3859 0.6440 0.028 Uiso 1 1 calc R . .
C15 C -0.0911(3) 0.4534(3) 0.7444(2) 0.0237(5) Uani 1 1 d . . .
H15 H -0.1064 0.3898 0.7907 0.028 Uiso 1 1 calc R . .
C16 C 0.0681(3) 0.5519(3) 0.7623(2) 0.0215(5) Uani 1 1 d . . .
H16 H 0.1592 0.5538 0.8220 0.026 Uiso 1 1 calc R . .
Co1 Co 1.0000 1.0000 1.0000 0.01250(9) Uani 1 2 d S . .
O1 O 0.9933(3) 1.1871(2) 0.9772(2) 0.0301(5) Uani 1 1 d . . .
H1A H 0.911(5) 1.202(4) 0.972(3) 0.045(11) Uiso 1 1 d . . .
H1B H 1.075(5) 1.253(4) 0.972(3) 0.058(12) Uiso 1 1 d . . .
O2 O 0.4817(3) 0.6181(2) 0.1295(2) 0.0463(6) Uani 1 1 d . . .
H2A H 0.520(12) 0.563(10) 0.202(9) 0.26(4) Uiso 1 1 d . . .
H2B H 0.469(10) 0.726(9) 0.162(7) 0.20(3) Uiso 1 1 d . . .
O3 O 0.2365(3) 0.4015(3) 0.9550(2) 0.0438(6) Uani 1 1 d . . .
H3A H 0.316(5) 0.358(4) 0.928(3) 0.055(11) Uiso 1 1 d . . .
H3B H 0.295(5) 0.459(4) 1.021(4) 0.064(13) Uiso 1 1 d . . .
 
loop_
 _atom_site_aniso_label
 _atom_site_aniso_U_11
 _atom_site_aniso_U_22
 _atom_site_aniso_U_33
 _atom_site_aniso_U_23
 _atom_site_aniso_U_13
 _atom_site_aniso_U_12
W1 0.00816(5) 0.01721(5) 0.01148(5) 0.00011(3) 0.00163(3) 0.00352(3)
C1 0.0149(12) 0.0209(12) 0.0160(11) 0.0015(9) 0.0043(9) 0.0060(9)
N1 0.0145(10) 0.0227(11) 0.0187(10) -0.0003(8) 0.0026(8) 0.0047(8)
C2 0.0123(11) 0.0235(13) 0.0197(12) 0.0029(10) 0.0036(9) 0.0031(10)
N2 0.0227(11) 0.0251(12) 0.0334(13) 0.0034(10) 0.0065(10) 0.0095(10)
C3 0.0136(11) 0.0254(13) 0.0199(12) 0.0013(10) 0.0005(9) 0.0093(10)
N3 0.0315(13) 0.0402(14) 0.0188(11) 0.0074(10) 0.0062(9) 0.0195(11)
C4 0.0148(11) 0.0212(12) 0.0178(12) 0.0009(9) 0.0012(10) 0.0048(9)
N4 0.0220(11) 0.0319(13) 0.0254(12) 0.0023(10) 0.0098(10) 0.0077(10)
C5 0.0162(11) 0.0244(13) 0.0141(11) 0.0005(9) 0.0025(9) 0.0065(10)
N5 0.0294(12) 0.0248(12) 0.0226(11) 0.0021(9) 0.0027(9) 0.0035(10)
C6 0.0146(11) 0.0216(12) 0.0139(11) 0.0050(9) 0.0020(9) 0.0045(9)
N6 0.0165(10) 0.0255(11) 0.0170(10) 0.0052(8) 0.0048(8) 0.0088(9)
N7 0.0111(9) 0.0192(10) 0.0158(9) 0.0002(8) 0.0032(8) 0.0034(8)
N8 0.0127(9) 0.0197(10) 0.0174(10) 0.0020(8) 0.0038(8) 0.0053(8)
C7 0.0145(11) 0.0248(13) 0.0189(12) 0.0043(10) 0.0047(9) 0.0019(10)
C8 0.0250(13) 0.0252(13) 0.0188(12) 0.0056(10) 0.0047(10) 0.0064(11)
C9 0.0221(13) 0.0264(13) 0.0172(12) 0.0032(10) -0.0003(10) 0.0097(11)
C10 0.0123(11) 0.0246(13) 0.0192(12) 0.0001(10) 0.0013(9) 0.0058(10)
C11 0.0126(11) 0.0181(11) 0.0162(11) -0.0003(9) 0.0053(9) 0.0053(9)
C12 0.0135(11) 0.0206(12) 0.0157(11) -0.0001(9) 0.0041(9) 0.0066(9)
C13 0.0130(11) 0.0270(13) 0.0190(12) 0.0013(10) 0.0025(9) 0.0031(10)
C14 0.0186(12) 0.0222(13) 0.0250(13) -0.0003(10) 0.0085(10) 0.0021(10)
C15 0.0250(13) 0.0205(12) 0.0264(13) 0.0067(10) 0.0105(11) 0.0054(10)
C16 0.0177(12) 0.0239(13) 0.0237(13) 0.0070(10) 0.0039(10) 0.0081(10)
Co1 0.00830(19) 0.0151(2) 0.0131(2) 0.00164(16) 0.00216(16) 0.00368(16)
O1 0.0208(10) 0.0230(10) 0.0560(14) 0.0182(9) 0.0180(10) 0.0110(9)
O2 0.0604(16) 0.0386(13) 0.0492(14) 0.0173(11) 0.0149(12) 0.0255(12)
O3 0.0358(13) 0.0357(13) 0.0543(16) 0.0163(12) 0.0095(12) 0.0015(11)
 
_geom_special_details
;
 All esds (except the esd in the dihedral angle between two l.s. planes)
 are estimated using the full covariance matrix.  The cell esds are taken
 into account individually in the estimation of esds in distances, angles
 and torsion angles; correlations between esds in cell parameters are only
 used when they are defined by crystal symmetry.  An approximate (isotropic)
 treatment of cell esds is used for estimating esds involving l.s. planes.
;
 
loop_
 _geom_bond_atom_site_label_1
 _geom_bond_atom_site_label_2
 _geom_bond_distance
 _geom_bond_site_symmetry_2
 _geom_bond_publ_flag
W1 C3 2.142(3) . ?
W1 C2 2.147(3) . ?
W1 C4 2.149(2) . ?
W1 C5 2.149(3) . ?
W1 C1 2.153(2) . ?
W1 C6 2.176(2) . ?
W1 N7 2.2231(19) . ?
W1 N8 2.2256(19) . ?
C1 N1 1.145(3) . ?
N1 Co1 2.099(2) . ?
C2 N2 1.142(3) . ?
C3 N3 1.150(3) . ?
C4 N4 1.149(3) . ?
C5 N5 1.147(3) . ?
C6 N6 1.146(3) . ?
N6 Co1 2.166(2) 1_455 ?
N7 C7 1.352(3) . ?
N7 C11 1.361(3) . ?
N8 C16 1.353(3) . ?
N8 C12 1.361(3) . ?
C7 C8 1.379(3) . ?
C8 C9 1.381(4) . ?
C9 C10 1.383(4) . ?
C10 C11 1.386(3) . ?
C11 C12 1.466(3) . ?
C12 C13 1.390(3) . ?
C13 C14 1.377(4) . ?
C14 C15 1.381(4) . ?
C15 C16 1.378(3) . ?
Co1 O1 2.045(2) 2_777 ?
Co1 O1 2.045(2) . ?
Co1 N1 2.099(2) 2_777 ?
Co1 N6 2.166(2) 1_655 ?
Co1 N6 2.166(2) 2_677 ?
 
loop_
 _geom_angle_atom_site_label_1
 _geom_angle_atom_site_label_2
 _geom_angle_atom_site_label_3
 _geom_angle
 _geom_angle_site_symmetry_1
 _geom_angle_site_symmetry_3
 _geom_angle_publ_flag
C3 W1 C2 80.13(9) . . ?
C3 W1 C4 138.99(9) . . ?
C2 W1 C4 70.09(9) . . ?
C3 W1 C5 110.86(9) . . ?
C2 W1 C5 137.91(9) . . ?
C4 W1 C5 77.14(9) . . ?
C3 W1 C1 69.65(9) . . ?
C2 W1 C1 75.33(9) . . ?
C4 W1 C1 75.84(9) . . ?
C5 W1 C1 71.54(9) . . ?
C3 W1 C6 70.60(9) . . ?
C2 W1 C6 143.41(9) . . ?
C4 W1 C6 145.90(9) . . ?
C5 W1 C6 74.92(9) . . ?
C1 W1 C6 112.59(9) . . ?
C3 W1 N7 142.84(8) . . ?
C2 W1 N7 115.05(8) . . ?
C4 W1 N7 77.06(8) . . ?
C5 W1 N7 81.24(8) . . ?
C1 W1 N7 145.05(8) . . ?
C6 W1 N7 79.70(8) . . ?
C3 W1 N8 79.54(8) . . ?
C2 W1 N8 75.12(8) . . ?
C4 W1 N8 117.32(8) . . ?
C5 W1 N8 145.51(8) . . ?
C1 W1 N8 140.22(8) . . ?
C6 W1 N8 78.31(8) . . ?
N7 W1 N8 72.85(7) . . ?
N1 C1 W1 178.6(2) . . ?
C1 N1 Co1 174.1(2) . . ?
N2 C2 W1 177.1(2) . . ?
N3 C3 W1 174.0(2) . . ?
N4 C4 W1 178.5(2) . . ?
N5 C5 W1 178.0(2) . . ?
N6 C6 W1 171.4(2) . . ?
C6 N6 Co1 150.91(19) . 1_455 ?
C7 N7 C11 117.7(2) . . ?
C7 N7 W1 124.63(15) . . ?
C11 N7 W1 117.56(15) . . ?
C16 N8 C12 118.2(2) . . ?
C16 N8 W1 124.24(16) . . ?
C12 N8 W1 117.49(15) . . ?
N7 C7 C8 123.1(2) . . ?
C7 C8 C9 119.0(2) . . ?
C8 C9 C10 118.7(2) . . ?
C9 C10 C11 120.0(2) . . ?
N7 C11 C10 121.4(2) . . ?
N7 C11 C12 115.6(2) . . ?
C10 C11 C12 122.9(2) . . ?
N8 C12 C13 121.1(2) . . ?
N8 C12 C11 115.6(2) . . ?
C13 C12 C11 123.3(2) . . ?
C14 C13 C12 120.0(2) . . ?
C13 C14 C15 118.9(2) . . ?
C16 C15 C14 119.2(2) . . ?
N8 C16 C15 122.6(2) . . ?
O1 Co1 O1 180.000(1) 2_777 . ?
O1 Co1 N1 87.26(9) 2_777 2_777 ?
O1 Co1 N1 92.74(9) . 2_777 ?
O1 Co1 N1 92.74(9) 2_777 . ?
O1 Co1 N1 87.26(9) . . ?
N1 Co1 N1 180.000(1) 2_777 . ?
O1 Co1 N6 88.71(8) 2_777 1_655 ?
O1 Co1 N6 91.29(8) . 1_655 ?
N1 Co1 N6 88.28(8) 2_777 1_655 ?
N1 Co1 N6 91.72(8) . 1_655 ?
O1 Co1 N6 91.29(8) 2_777 2_677 ?
O1 Co1 N6 88.71(8) . 2_677 ?
N1 Co1 N6 91.72(8) 2_777 2_677 ?
N1 Co1 N6 88.28(8) . 2_677 ?
N6 Co1 N6 180.000(1) 1_655 2_677 ?
 
_diffrn_measured_fraction_theta_max    0.904
_diffrn_reflns_theta_full              27.39
_diffrn_measured_fraction_theta_full   0.904
_refine_diff_density_max    1.074
_refine_diff_density_min   -0.661
_refine_diff_density_rms    0.074
